# Supplementary material for: Guidelines for Research Data Integrity (GRDI)
Source: Springer Nature journal article supplement (doi:10.1038/s41597-024-04312-x), 2025-01-17
Supplement: MOESM2 [file 41597_2024_4312_MOESM2_ESM.pdf › 41597_2024_4312_MOESM2_ESM.pdf]

## GRDI: Guidelines for Research Data Integrity - Examples

GRDI provides essential guidance for maintaining data quality and reproducibility throughout the research process. The following two screenshots illustrate some of the common pitfalls in data formatting and contrast them with a more optimal approach. For further details, please refer to [https://ascgitlab.helmholtz-munich.de/cf\\_statcon/GRDI](https://ascgitlab.helmholtz-munich.de/cf_statcon/GRDI).

**Diagnosis of diabetes**

| Male or Female? | diab | BMI       | Hemoglobin measured in g/dL |        |
|-----------------|------|-----------|-----------------------------|--------|
| F               | y    | 65/1.65^2 | 13                          | Type 1 |
| Female          | yes  | 76/1.71^2 | 15                          | Type 2 |
| male            | no   | 82/1.76^2 | 14                          |        |
| Male            | y    | 69/1.61^2 | 9999                        |        |
| female          | no   | 79/1.73^2 | 12                          |        |
| male            | no   | 67/1.69^2 | 11                          |        |
| Female          | n    | 72/1.72^2 | unknown                     |        |
| m               | yes  | 77/1.87^2 | 14                          |        |
| female          | yes  | 68/1.74^2 | 16                          |        |
| male            | no   | 84/1.81^2 | 10                          |        |
| f               | y    | 69/1.71^2 | 12                          |        |
| male            | yes  | 78/1.78^2 | 16                          |        |

Supplementary Figure S1: Bad example of how data can be formatted and saved as xlsx.

| ID | sex    | diabetes | diabetes_type | weight_kg | height_m | hemoglobin_gdL |
|----|--------|----------|---------------|-----------|----------|----------------|
| 1  | female | yes      | 1             | 65        | 1.65     | 13             |
| 2  | female | yes      | 2             | 76        | 1.71     | 15             |
| 3  | male   | no       | NA            | 82        | 1.76     | 14             |
| 4  | male   | yes      | 1             | 69        | 1.61     | NA             |
| 5  | female | no       | NA            | 79        | 1.73     | 12             |
| 6  | male   | no       | NA            | 67        | 1.69     | 11             |
| 7  | female | no       | NA            | 72        | 1.72     | NA             |
| 8  | male   | yes      | 1             | 77        | 1.87     | 14             |
| 9  | female | yes      | 2             | 68        | 1.74     | 16             |
| 10 | male   | no       | NA            | 84        | 1.81     | 10             |
| 11 | female | yes      | 2             | 69        | 1.71     | 12             |
| 12 | male   | yes      | 1             | 78        | 1.78     | 16             |

Supplementary Figure S2: Good example of data formatting as csv.
